# Supplementary material for: Revealing Assembly of a Pore-Forming Complex Using Single-Cell Kinetic Analysis and Modeling
Source: PubMed Central journal article supplement — Biophys J. 2016 Apr 12;110(7):1574–81. doi: 10.1016/j.bpj.2016.02.035 (PMC4833779; doi:10.1016/j.bpj.2016.02.035), 2016-04-12
Supplement: mmc1.pdf [file mmc1.pdf]

**Biophysical Journal, Volume 110**

**Supplemental Information**

**Revealing Assembly of a Pore-Forming Complex Using Single-Cell Kinetic Analysis and Modeling**

**Mirko Bischofberger, Ioan Iacovache, Daniel Boss, Felix Naef, F. Gisou van der Goot, and Nacho Molina**

**Supporting Material:**  
**Revealing assembly of a pore forming complex**  
**using single-cell kinetic analysis and modeling**

M. Bischofberger, I. Iacovache, D. Boss,  
F. Naef, F. G. van der Goot\* and N. Molina\*

**SUPPORTING FIGURES:**

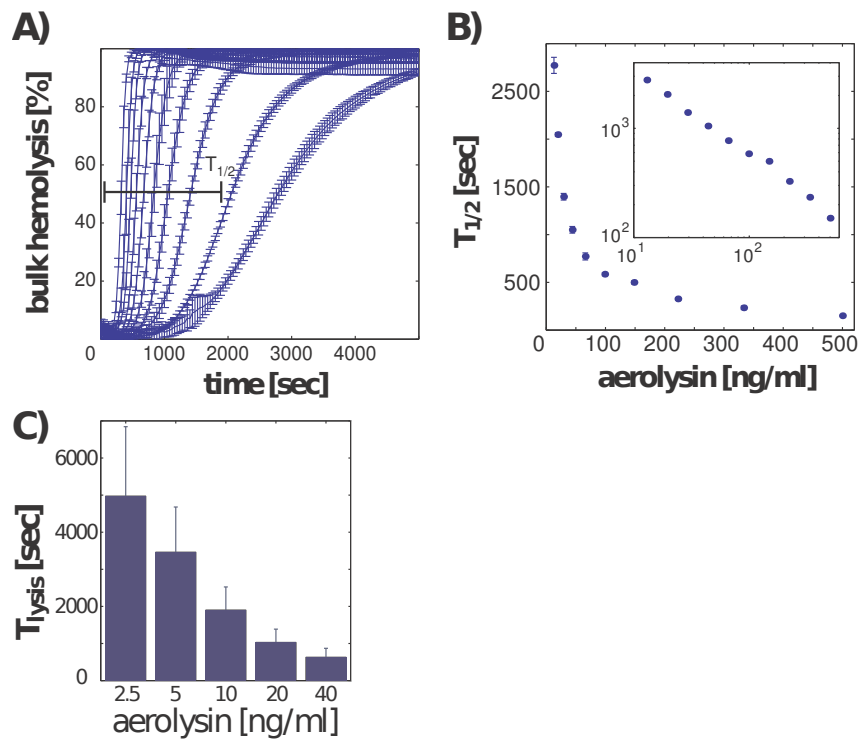

**Figure S1. Bulk hemolysis with aerolysin.** A) Red blood cells were treated with a serial dilution of 13-500ng/ml aerolysin and the absorbance at 450nm was recorded over time. Average of triplicates are shown. B) Half maximal lysis times in function of different initial aerolysin concentrations. *Inset:* Log-log plot. C) Spherization times extracted from the single-cell for different initial concentrations of aerolysin.

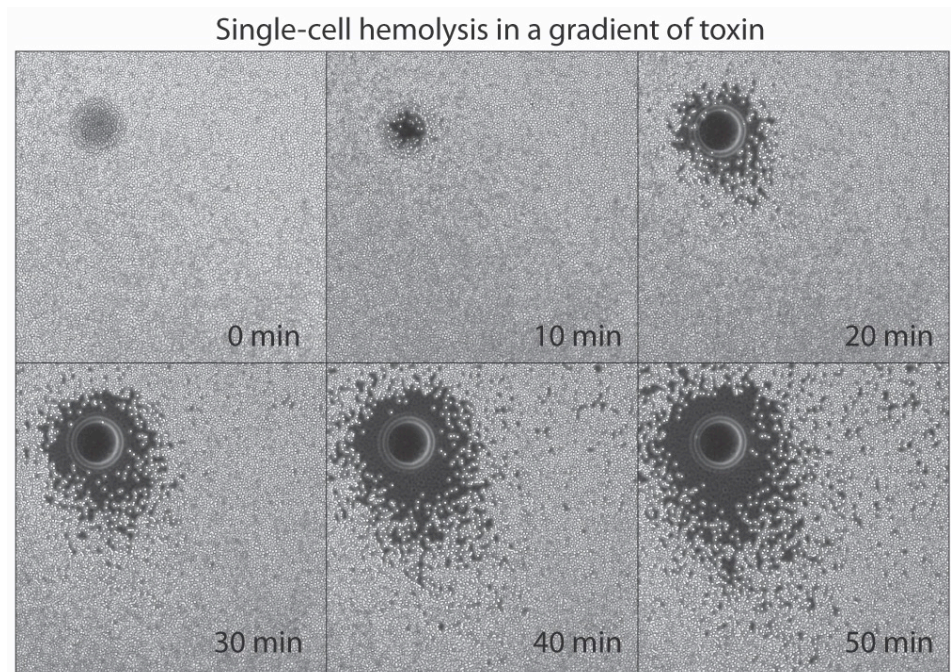

**Figure S2. Stochastic lysis of erythrocytes in a gradient of toxin.** **A)** Images of a lawn of erythrocytes at 0, 19, 20, 30, 40 and 50 minutes after the aerolysin-soaked bead exposure (dark circle in the upper-left corner). **B)** Light intensity as function of time and radial distance from the aerolysin-soaked bead.

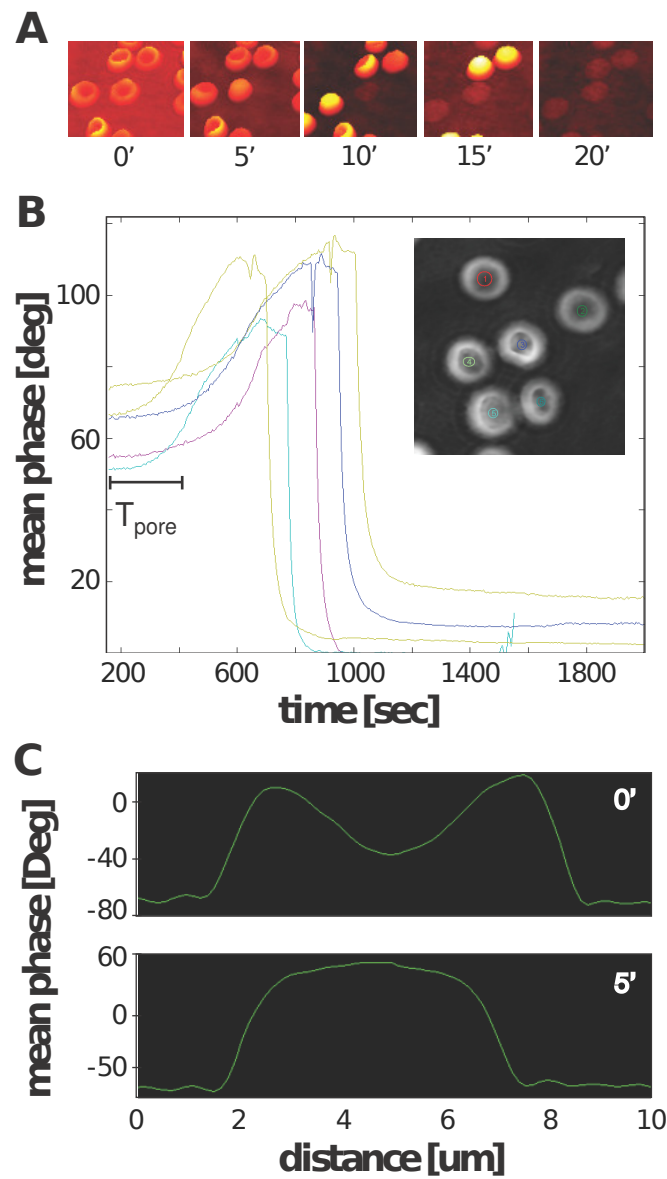

**Figure S3. Digital holographic microscopy of erythrocytes treated with aerolysin.**

**A)** Surface reconstruction of a subset of red blood cells treated with 50ng/ml of aerolysin. **B)** Representative single-cell traces for 5 different cells. **C)** Cross section of a red blood cell at time  $t=0$  min and at time  $t=5$ min.

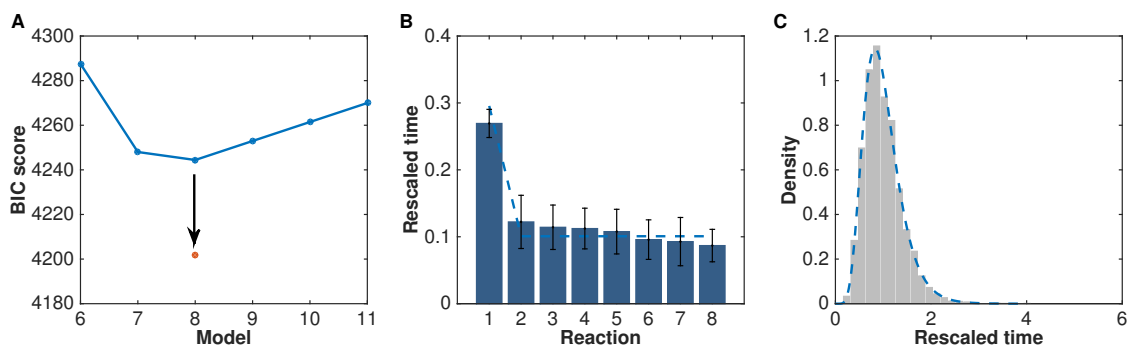

**Figure S4. Test of the inference procedure on simulated data from a 7eq+1 model.** **A)** BIC scores of models with reactions of different rates (blue) or with  $n$  reactions of equal rates plus an additional reaction (red dots). **B)** Posterior mean reaction times (bars) and posterior standard deviation (error bars) of an  $N=8$  different reaction model computed via MCMC sampling. Dashed line represents the fitted reaction times of a 7eq+1 reaction model. **C)** Fit of a 7eq+1 reaction model (dashed line) to the rescaled pore formation lag times (bars).

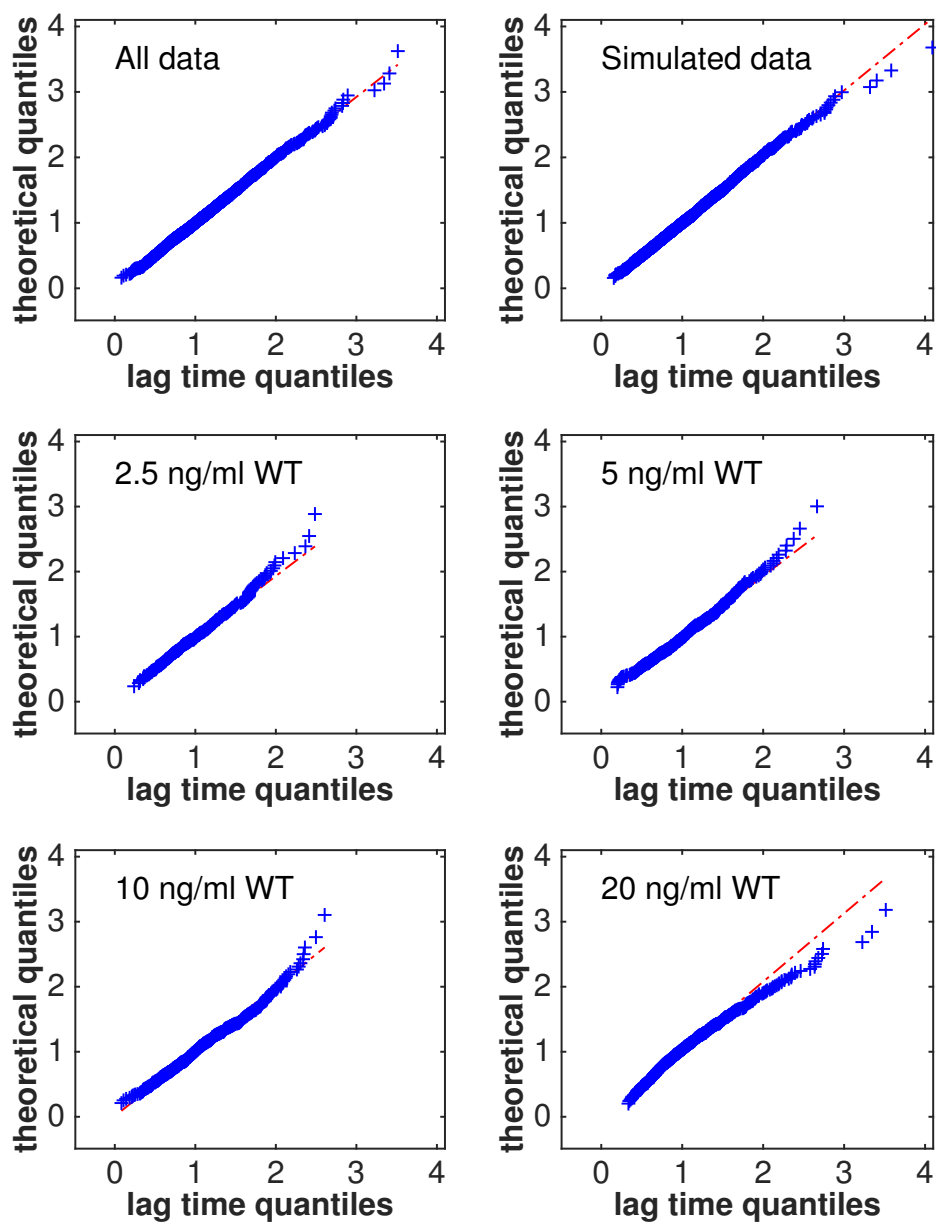

**Figure S5. Quantile-quantile plots.** A, B) Quantile-quantile plots of the pore formation lag time distributions of aerolysin against the fits of  $7eq+1$  model distributions with  $N=8$  (see main text).

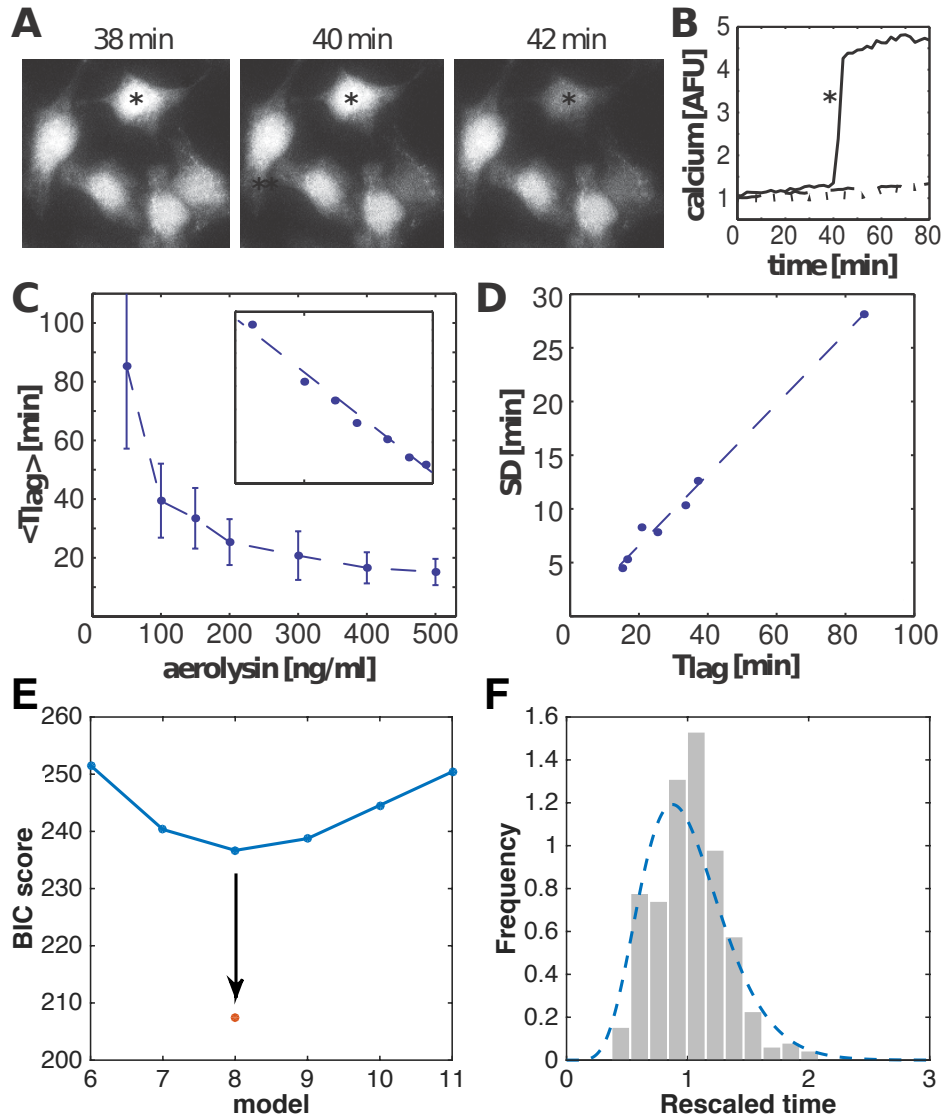

**Figure S6. Pore formation lag times in nucleated cells.** **A)** Thapsigargin treated-HeLa cells loaded with the calcium-sensitive dye Fura-FF, imaged every 2 minutes after aerolysin (100 ng/ml) treatment. **B)** Example of calcium influx in a cell from **A)** upon pore formation. No calcium increase is observed upon treatment with the pore formation mutant Y221G (dotted line) or without toxin (dashed line). **C)** Signature of pore formation time  $T_{lag}$  versus initial toxin concentration. *Inset:* Log-log plot. **D)** Linear scaling of standard deviation (SD) in function of mean pore formation times  $T_{lag}$ . **E)** BIC scores of models with reactions of different rates (blue) or with 7 reactions of equal rates plus an additional reaction (red dot). **F)** Distribution of rescaled lag times for aerolysin fitted to a  $7eq+1$  model distribution.

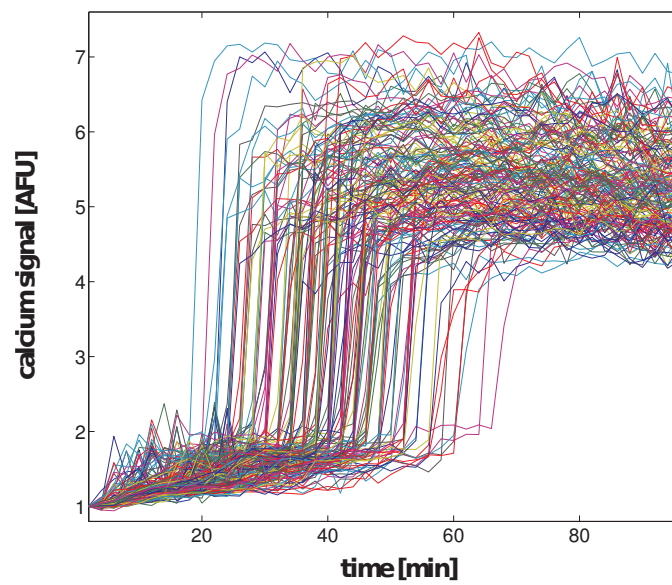

**Figure S7. Calcium traces of aerolysin-treated HeLa cells.** Subset of single-cell traces obtained for HeLa cells loaded with the calcium-sensitive dye Fura-FF and challenged with 100 ng/ml of aerolysin.
